# Supplementary material for: Study of the interaction of water with the aqua-soluble dimeric complex [RuCp(PTA)2–μ-CN–1κC:2κ2N-RuCp(PTA)2](CF3SO3) (PTA = 1,3,5-triaza-7-phosphaadamantane) by neutron and X-ray diffraction in solution
Source: Royal Society of Chemistry journal article supplement (doi:10.1039/c4cc05225k), 2014-01-01
Supplement: c4cc05225k1.pdf [file c4cc05225k1.pdf]

# Study of the interaction of water with the aqua-soluble dimeric complex $[\text{RuCp}(\text{PTA})_2-\mu\text{-CN-}1\kappa\text{C:}2\kappa^2\text{N-RuCp}(\text{PTA})_2](\text{CF}_3\text{SO}_3)$ (PTA = 1,3,5-triaza-7-phosphaadamantane) by Neutrons and X-ray diffraction in solution.

Manuel Serrano-Ruiz,<sup>a</sup> Silvia Imberti,<sup>b</sup> Leonardo Bernasconi,<sup>c</sup> Nazira Jagadayeva,<sup>a</sup> Franco Scalambra,<sup>a</sup> Antonio Romerosa<sup>a,\*</sup>

<sup>a</sup> Área de Química Inorgánica-CIESOL, Universidad de Almería, 04071 Almería, Spain. E-mail: [romerosa@ual.es](mailto:romerosa@ual.es).

<sup>b</sup> ISIS, STFC Rutherford Appleton Laboratory, Harwell Oxford, Didcot, OX11 0QX, United Kingdom.

<sup>c</sup> Scientific Computing Department, STFC Rutherford Appleton Laboratory, Harwell Oxford, Didcot, OX11 0QX, United Kingdom.

† Electronic supplementary information (ESI) available. CCDC

CCDC 1000027. For ESI and crystallographic data in CIF or other electronic format see DOI: 10.1039/c000000x/

## Supporting Information

### Materials and Methods

All chemicals were reagent grade and, unless otherwise stated, were used as received by commercial suppliers. All reactions were carried out in a pure argon atmosphere by using standard Schlenk-tube techniques with freshly distilled and oxygen-free solvents. The hydrosoluble phosphine-PTA and the complex  $[\text{RuClCp}(\text{PTA})_2]$  were prepared as described in the literature.<sup>1</sup>  $^1\text{H}$ ,  $^{31}\text{P}\{^1\text{H}\}$ ,  $^{13}\text{C}\{^1\text{H}\}$  NMR were routinely conducted on the Bruker DRX300 (300.13 MHz). The  $^1\text{H},^1\text{H}$  2D COSY and  $^1\text{H},^{13}\text{C}\{^1\text{H}\}$  HSQC NMR experiments were routinely conducted on the same instrument in the absolute magnitude mode using a 45 or 90° pulse after the increment delay. Peak positions are relative to tetramethylsilane and were calibrated against the residual solvent resonance ( $^1\text{H}$ ) or the deuterated solvent multiplet ( $^{13}\text{C}\{^1\text{H}\}$ ). Chemical shifts for  $^{31}\text{P}\{^1\text{H}\}$  NMR spectra were measured relative to external 85 %  $\text{H}_3\text{PO}_4$ . Infrared spectra were recorded on KBr disks using a Bruker Vertex 70 FT-IR spectrometer. UV-vis spectra were obtained with a Jasco V-650 spectrometer from solutions of  $10^{-3}$ - $10^{-5}$  M in quartz cuvettes (1 cm optical path). Specific absorption coefficients were obtained by linear regression over 5-7 points ( $R^2 \geq 0.999$ ). Elemental analyses (C, H, N, S) were performed on a Fisons Instrument EA 1108 elemental analyzer.

### *Synthesis of 1(CF<sub>3</sub>SO<sub>3</sub>)*

The complex **1(CF<sub>3</sub>SO<sub>3</sub>)** was obtained by two different procedures:

Method A: [RuCpCl(PTA)<sub>2</sub>] (250 mg, 0.484 mmol) was reacted with Ag(CF<sub>3</sub>SO<sub>3</sub>) (121 mg, 0.470 mmol) in 40 mL of MeOH/H<sub>2</sub>O (2.5:1). After 1,5h at room temperature the resulting mixture was filtered through sintered glass with celite and its volume reduced until the elimination of the solvent. The obtained powder was added to a solution of [RuCp(CN-κC)(PTA)<sub>2</sub>] (200 mg, 0.395 mmol) in 20 mL of a mixture MeOH/H<sub>2</sub>O (2:1). The resulting solution was kept at 90°C for 2h, cooled to room temperature and filtered. The solvent was completely evaporated and the resulting powder dissolved in 2 mL of EtOH. Addition of Et<sub>2</sub>O (20 mL) precipitated a yellow powder, which was filtered, washed with Et<sub>2</sub>O (3x10mL) and vacuum dried.

Method B: Similarly to the previous method, the complex [RuCpCl(PTA)<sub>2</sub>] (250 mg, 0.484 mmol) was reacted with Ag(CF<sub>3</sub>SO<sub>3</sub>) (121 mg, 0.470 mmol) in 40 mL of MeOH/H<sub>2</sub>O (2.5:1). After 1,5h at room temperature the resulting mixture was filtered through sintered glass with celite. Into the resulting solution was added KCN (15 mg, 0.230 mmol). After 2 hour at 90 °C the solution was cooled, filtered through sintered glass and its volume reduced until the elimination of the solvent. The obtained residue was dissolved in 2 mL of EtOH. Addition of 20 mL of Et<sub>2</sub>O gave rise to a yellow-orange precipitate that was filtered, washed with Et<sub>2</sub>O (2 x 2 mL) and air dried. Crystals suitable for single crystal X-ray diffraction were obtained from a concentrated dissolution in H<sub>2</sub>O/DMSO (1:1). Power yield: 0.406 g, 82%. S<sub>25</sub>(mg/cm<sup>3</sup>): 320. Elemental analysis for C<sub>36</sub>H<sub>76</sub>ClN<sub>13</sub>O<sub>9</sub>P<sub>4</sub>Ru<sub>2</sub> (1184.55): Found C, 35.53; H, 6.27; N, 15.59. Calcd. C, 35.49; H, 6.47; N, 15.37. IR (KBr): ν = 2113 cm<sup>-1</sup> (μ-N≡C); ν = 2057 cm<sup>-1</sup> (μ-C≡N); 1280, 1241, 1167, 1099 ν(OSO+C-N). <sup>1</sup>H NMR (300,13 MHz, 23 ° C, TMS, D<sub>2</sub>O): δ = 3.85-3.97 (m, 24 H, NCH<sub>2</sub>P); 4.38-4.50 (m, 24 H, NCH<sub>2</sub>N); 4.80, 4.94 (s, s, Cp). <sup>31</sup>P{<sup>1</sup>H} NMR (121.49 MHz, 23 °C, 85 % H<sub>3</sub>PO<sub>4</sub>, D<sub>2</sub>O): δ = -19.35 (s, PTA<sub>Ru-CN</sub>), -21.97 (s, PTA<sub>Ru-CN</sub>). <sup>31</sup>C{<sup>1</sup>H} NMR (75.467 MHz, 23 °C, TMS, D<sub>2</sub>O): δ = 56.38 (t, <sup>1</sup>J<sub>CP</sub> = 9.51 Hz, NCH<sub>2</sub>P), 70.75 (s, NCH<sub>2</sub>N), 77.57 (s, Cp<sub>Ru-NC</sub>), 80.16 (s, Cp<sub>Ru-CN</sub>), 151.94 (m, CN). UV/Vis (H<sub>2</sub>O, 5x10<sup>-4</sup> mol/L) λ<sub>max</sub>/nm (ε/dm<sup>3</sup> mol<sup>-1</sup> cm<sup>-1</sup>): 314 (2905), 222 (9723). UV/Vis (DMSO, 5x10<sup>-4</sup> mol/L) λ<sub>max</sub>/nm (ε/dm<sup>3</sup> mol<sup>-1</sup> cm<sup>-1</sup>): 321 (3515), 260 (4896).

## X-ray crystal structure experimental details for complex **1(CF<sub>3</sub>SO<sub>3</sub>)·6H<sub>2</sub>O**

Yellow-orange crystals of **1** were obtained by slow evaporation of its dissolution in H<sub>2</sub>O/DMSO. Crystal data for **1**, C<sub>35</sub>H<sub>76</sub>ClN<sub>13</sub>O<sub>9</sub>P<sub>4</sub>Ru<sub>2</sub>, Triclinic, space group *P*-1 (no. 2),  $a = 14.5313(7)$ ,  $b = 17.5256(8)$ ,  $c = 18.3097(9)$ ,  $\alpha = 66.9270(10)$ ,  $\beta = 73.1200(10)$ ,  $\gamma = 76.5130(10)$ ,  $V = 4067.1(3) \text{ \AA}^3$ ,  $Z = 1$ ,  $\rho_{\text{calcd}} = 1.429 \text{ g.cm}^{-3}$ , final  $R_I$  value 0.0569 for 14015 independent reflections ( $I > 2\sigma(I)$ ). The data collections were performed at 100 K on a Bruker APEX CCD area detector diffractometer, using MoK $\alpha$  radiation ( $\lambda = 0.71073 \text{ \AA}$ ) by the  $\omega$  scan method, within the limits  $4.722 < \theta < 49.958^\circ$ . Empirical absorption correction was applied with  $T_{\text{min}} = 0.855$  and  $T_{\text{max}} = 0.889$ . The structure was solved by direct methods (SIR97) and refined by full matrix least squares on  $F^2$  (SHELX 97).<sup>2</sup> Anisotropic thermal factors were assigned to all the non-hydrogen atoms. All the H atoms were placed in calculated positions and not refined. All the diagrams were generated by using the SHELXL program. **CCDC 1000027** contains the supplementary crystallographic data for this paper. These data can be obtained free of charge via the World Wide Web (or from the Cambridge Crystallographic Data Centre, 12 Union Road, Cambridge CB21EZ, UK; fax: (+44)1223-336-033 or emailing [deposit@ccdc.cam.ac.uk](mailto:deposit@ccdc.cam.ac.uk)).

Table S1. Selected crystallographic data for **1(CF<sub>3</sub>SO<sub>3</sub>)·6H<sub>2</sub>O**

|                                               | <b>1(CF<sub>3</sub>SO<sub>3</sub>)·6H<sub>2</sub>O</b>                             |
|-----------------------------------------------|------------------------------------------------------------------------------------|
| Empirical formula                             | C <sub>35</sub> H <sub>76</sub> ClN <sub>13</sub> O <sub>9</sub> P <sub>4</sub> Ru |
| Formula weight                                | 1184.55                                                                            |
| Crystal dimensions (mm <sup>3</sup> )         | 0.200x0.170x0.150                                                                  |
| Crystal system                                | Triclinic                                                                          |
| Space group                                   | P-1                                                                                |
| $a$ [Å]                                       | 14.5313(7)                                                                         |
| $b$ [Å]                                       | 17.5256(8)                                                                         |
| $c$ [Å]                                       | 18.3097(9)                                                                         |
| $\alpha$ [deg]                                | 66.9270(10)                                                                        |
| $\beta$ [deg]                                 | 73.1200(10)                                                                        |
| $\gamma$ [deg]                                | 76.5130(10)                                                                        |
| $Z$                                           | 3                                                                                  |
| Volume [Å <sup>3</sup> ]                      | 4067.1(3)                                                                          |
| $\rho_{\text{calcd.}}$ [mg·cm <sup>-3</sup> ] | 1.429                                                                              |
| $\mu$ [mm <sup>-1</sup> ]                     | 0.781                                                                              |

|                                  |                 |
|----------------------------------|-----------------|
| F(000)                           | 1788            |
| Data/Restraints/Parameters       | 14015 / 3 / 940 |
| R1 [I>2σ(I)] (all)               | 0.0569 (0.0640) |
| wR2 [I>2σ(I)] (all)              | 0.1679 (0.1767) |
| GOF                              | 1.062           |
| $\Delta\rho$ [e·Å <sup>3</sup> ] | 2.841; -0.849   |

---

*Average of Selected bond distances (Å) and angles (°) for complex 1.*

Ru-P 2.258(5); Ru-N(C) 2.018(10); Ru1-Cp<sub>(centroid)</sub> 1.874(4); N<sub>CN</sub>-C<sub>CN</sub> 1.145(8); P-Ru-P 95.09(1.29); N(C)-Ru-P 85.99(2.70).

### **Single crystal structure and main properties discussion of 1(CF<sub>3</sub>SO<sub>3</sub>)<sub>6</sub>H<sub>2</sub>O.**

Slow crystallization in air of a H<sub>2</sub>O/DMSO solution of **1** gave yellow-orange crystals suitable for single crystal X-ray diffraction data collection.<sup>3</sup> The asymmetric unit cell of **1** in the solid state is constituted by 6 disordered water molecules, three CF<sub>3</sub>SO<sub>3</sub><sup>-</sup> anions and three binuclear-cationic-complex in which two piano-stool-{CpRu(PTA)<sub>2</sub>} moieties are linked by a disordered CN<sup>-</sup> ligand (73/27 %) that links both metals to each other (Figure 1). Selected bond lengths and angles are provided in the Supporting Information. Both Cp and PTA ligands are in opposite directions as imposed by the “i” symmetry element at the middle of the C-N bond length (Ru-CN(NC) = 2.012(5) Å; C≡N = 1.137(9) Å; Ru-CN(NC) = 2.028(5) Å; C≡N = 1.151(10) Å). The Ru-CN-Ru bond lengths in **1**

are similar to those found for Cp-ruthenium complexes containing coordinate CN<sup>-</sup> and,<sup>4</sup> most interestingly, in the complex  $\{[(\text{PTA})_2\text{CpRu}-\mu\text{-CN-RuCp}(\text{PTA})_2]-\mu\text{-Au}(\text{CN})_4]\}_n$  (Ru-CN-Ru-Au).<sup>[3]</sup> The coordination geometry around ruthenium is more regular, with the Ru-Cp<sub>(centroid)</sub> distance (average: 1.874(4)Å) while the Ru-P separation is (average: 2.2584(54) Å).

The IR of **1**(CF<sub>3</sub>SO<sub>3</sub>)**6**H<sub>2</sub>O shows absorption bands for both Ru-NC (2113 cm<sup>-1</sup>) and Ru-CN (2057 cm<sup>-1</sup>) coordinated bridged ligand. The stretching frequencies ascribable to the Ru-CN bonded to Ru are somewhat similar (3 cm<sup>-1</sup>) to that of the cyano-ligand in the complex [RuCp(CN-κC)(PTA)<sub>2</sub>] (2060 cm<sup>-1</sup>) and different to the unique band observed for the polymeric complex Ru-CN-Ru-Au (2097 cm<sup>-1</sup>).<sup>3</sup> In general, the absorption of bridging cyano-groups is similar to that for parent bi-nuclear cyano-complexes.<sup>5</sup> Complex **1** is characterized by two singlet signals at -19.35 (PTA-Ru-N) and -21.97 (PTA-Ru-C) in <sup>31</sup>P{<sup>1</sup>H} NMR (D<sub>2</sub>O) that are close to that observed for the polymer Ru-CN-Ru-Au (-19.21 and -21.82 ppm). The <sup>1</sup>H NMR shows multiplets between 3,85 – 3,97 (PTA<sub>NCH<sub>2</sub>P</sub>) and 4,38 – 4,50 (PTA<sub>NCH<sub>2</sub>N</sub>) and, more interestingly, two signals at 4.80 (Cp) and 4.94 (Cp) that have similar chemical shifts to the polymer Ru-CN-Ru-Au (4.80 and 4.95 ppm Ru-Cp ligands),<sup>6</sup> while they appear in the <sup>13</sup>C{<sup>1</sup>H} NMR at 77.57 ppm (Cp-RuNC) and 80.16 ppm (Cp-RuCN), and the CN at 151.94 ppm (CN).

### **Experimental details for Neutron diffraction and EPSR simulation of neutron and X-ray diffraction data of 1(CF<sub>3</sub>SO<sub>3</sub>).6H<sub>2</sub>O in water**

For the neutron experiment complex **1**(CF<sub>3</sub>SO<sub>3</sub>)**6**H<sub>2</sub>O has been dissolved at 0.1M concentration in H<sub>2</sub>O, D<sub>2</sub>O and an equimolar mixture of the two (labelled HDO). The three solutions have then been transferred in flat TiZr alloy cans at 25°C (sample thickness 1mm). X-rays measurements have been performed on a sample at the same concentration in H<sub>2</sub>O, in a 1 mm fused quartz capillary tube. The neutron experiments have been performed on the SANDALS diffractometer at the ISIS spallation neutron source, located at the Rutherford Appleton Laboratory (United Kingdom). The neutron data have been corrected for detectors efficiency, attenuation, multiple scattering, and inelastic scattering using well established methods.<sup>[18a]</sup> White beam X-ray diffraction

data have been collected on a Panaytical Ag-source diffractometer also available at ISIS. High-energy X-ray data were corrected for detector efficiency, polarization, Compton scattering and fluorescence.<sup>[18a,b]</sup> Computational models of the system have been obtained through Empirical Potential Structure Refinement (EPSR).<sup>[19a,b]</sup> The algorithm is based on a classical Monte Carlo simulation of the molecular system under study at fixed concentration and density, and employs an iterative algorithm that aims at building an atomistic three dimensional model consistent with the scattering data. The simulation box contains four molecules of **1**, four  $\text{CF}_3\text{SO}_3^-$  anions and 2000 water molecules. The reference potential and molecular structure of **1** have been determined from the ab initio atomic structure in the gas phase and from the corresponding Mulliken population charges, both computed at the B3LYP level of DFT.<sup>[7]</sup> For triflate molecules they have been calculated via MOPAC energy minimisation routine, included in the EPSR distribution, while for water molecules the standard and proved SPC/E model has been adopted.<sup>[19c]</sup> Spatial Density Functions (SDF)<sup>[17]</sup> are calculated within EPSR with respect to a frame of reference attached to complex **1** in the following way: the Ruthenium atom (attached to central carbon) is represented as a green sphere at (0,0,0), with z axis coming through the middle of the five carbon atoms on the Cp group and the x axis going through one of these carbon atoms (the distribution has 5 fold symmetry by construction). After fixing the orientation of a central molecule in a Cartesian frame of reference, the positions of the other molecules between a minimum and a maximum radius are calculated as a function of the elevation angle theta and the azimuthal angle phi. The procedure is repeated for all the molecules in the box and for an ensemble of configurations.

Table S2. Parameters for the reference (seeding) potentials for EPSR simulations, in the form of Lennard-Jones potential depth  $\epsilon$  and radius  $\sigma$ , plus Coulombic partial charge  $q$ . The parameters have been derived from various sources: Complex 1 (from ab initio, see main text), triflate (from MOPAC minimisation, embedded into EPSR simulation) and water (SPC/E). Details of molecular structure (bond lengths, angles and dihedral angles) for all molecules are available upon request.

| Symbol | Atom type     | L-J $\epsilon$ [kJ/mol] | L-J $\sigma$ [Å] | Charge $q$ [e] |
|--------|---------------|-------------------------|------------------|----------------|
| CC     | central C     | 0.8                     | 3.7              | 0.1600         |
| NN     | central N     | 0.7                     | 3.2              | -0.5800        |
| Ruc    | Ru(-C)        | 0.8                     | 3.2              | 0.5000         |
| Run    | Ru(-N)        | 0.8                     | 3.2              | 0.4900         |
| Cp     | C (Cp)        | 0.8                     | 3.7              | -0.2800        |
| Hp     | H (Cp)        | 0.0                     | 0.0              | 0.2100         |
| P      | P (PTA)       | 0.8                     | 3.2              | 0.8924         |
| Cb1    | C (-P, PTA)   | 0.8                     | 3.7              | -0.6526        |
| Hb1    | (-C-P, PTA)   | 0.0                     | 0.0              | 0.2713         |
| Nb     | N (PTA)       | 0.7                     | 3.2              | -0.4683        |
| Cb2    | C (-N, PTA)   | 0.8                     | 3.7              | -0.1300        |
| Hb2    | H (-C-N, PTA) | 0.0                     | 0.0              | 0.2525         |
| Ot     | O (triflate)  | 0.65                    | 3.1              | -1.0233        |
| St     | S (triflate)  | 0.8                     | 3.2              | 2.8607         |
| Ct     | C (triflate)  | 0.8                     | 3.7              | -0.1260        |
| Ft     | F (triflate)  | 0.8                     | 3.2              | -0.2216        |
| OW     | O (water)     | 0.65                    | 3.166            | -0.8476        |
| HW     | H (water)     | 0.0                     | 0.0              | 0.4238         |

Figure S1 Structure factors from neutron and X-rays diffraction experiments (empty circles). EPSR calculation for the structure factors (line). Details of both techniques can be obtained from ref. 18a,b.

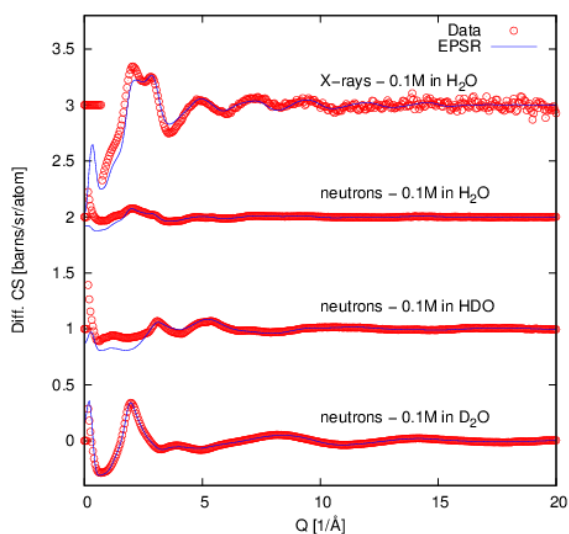

### Experimental details for theoretical calculations of 1

Density-Functional Theory (DFT) calculations at the B3LYP<sup>[8]</sup> level of theory were carried out using NWChem 6.1.1.<sup>[9]</sup> A Gaussian basis set expansion of the Kohn-Sham orbitals of 3-21G quality was used in all calculations. UV absorption spectra were computed using TD-DFT (at the TD-B3LYP level). UV absorption spectra were obtained by convoluting the 60 lowest singlet excitation energies obtained from the iterative (Davidson) solutions of the TD-DFT equations with a Gaussian distribution of FWHM=10 nm. For the gas phase complex, the TD-DFT calculations were carried out on the optimised geometry, whereas atomic configurations obtained from EPSR simulations were used to model the solvation environment. In the latter case, only water molecules within a sphere of radius  $r=9$  angstrom were included in the calculation. No relaxation of the atomic positions relative to the EPSR reference coordinates was allowed in this case.

Coupling DFT/TD-DFT calculations with classical force-field (EPSR) simulations is indeed one of the most innovative and technically challenging aspects of our work, to which we have devoted considerable work over the last three years. Our approach is based on a "self-consistent" procedure (details of which will appear in



future publications), which starts with a DFT calculation on the isolated organometallic complex in the gas phase. From this calculation we obtain atomic charges (e.g. Mulliken charges, see Supporting Information) and these are then used to parameterise an initial force field for the EPSR simulations. The potential is then refined in the course of the EPSR runs, to obtain pair correlation functions (PCFs), which can then be used to interpret the solvation shell structure of the solute. At least in principle there is a unique set of PCFs that are consistent with a given solvent structure. One of the innovative aspects of our work is then to use a set of instantaneous EPSR atomic configurations (not the PCFs themselves) of the solvated complex for the refined EPSR force field to perform DFT/TD-DFT calculations on “micro-solvated” samples (i.e. the complex surrounded by a few shells of water molecules, with the atomic position clamped to their EPSR values). The DFT calculations are not guaranteed to converge for a generic classical force-field atomic geometry. Our prescription provides EPSR geometries that are consistent with DFT (in virtue of the use of the DFT Mulliken charge constraint) and therefore pose less severe convergence problems.

Table S3. Atomic positions (in angstrom) for the isolated gas-phase complex 1

|    |          |          |          |
|----|----------|----------|----------|
| Ru | 19.84799 | 13.93531 | 17.35630 |
| P  | 19.84411 | 11.97398 | 16.23903 |
| P  | 19.16319 | 15.12597 | 15.56930 |
| N  | 19.97924 | 9.22018  | 16.39356 |
| N  | 20.94497 | 10.24761 | 14.38616 |
| N  | 18.52079 | 10.13686 | 14.65326 |
| N  | 19.37625 | 15.77047 | 12.88346 |
| N  | 17.20125 | 16.18021 | 13.90438 |
| N  | 19.11265 | 17.65000 | 14.41401 |
| C  | 20.03927 | 10.45717 | 17.23422 |
| H  | 20.90972 | 10.48719 | 17.70616 |

|   |          |          |          |
|---|----------|----------|----------|
| H | 19.32461 | 10.42118 | 17.91755 |
| C | 21.12046 | 11.59065 | 14.95151 |
| H | 21.06122 | 12.26029 | 14.22556 |
| H | 22.02128 | 11.65783 | 15.35627 |
| C | 18.34408 | 11.45451 | 15.26778 |
| H | 17.55703 | 11.43182 | 15.86918 |
| H | 18.16592 | 12.12409 | 14.55986 |
| C | 21.06263 | 9.20182  | 15.40379 |
| H | 21.92705 | 9.31049  | 15.87574 |
| H | 21.07308 | 8.31897  | 14.95642 |
| C | 19.64161 | 10.09406 | 13.74706 |
| H | 19.53216 | 10.81148 | 13.07356 |
| H | 19.62408 | 9.22699  | 13.26528 |
| C | 18.71948 | 9.14188  | 15.67254 |
| H | 18.65693 | 8.24922  | 15.25303 |
| H | 17.98172 | 9.21443  | 16.32802 |
| C | 19.85136 | 14.76564 | 13.88963 |
| H | 20.84134 | 14.78241 | 13.93060 |
| H | 19.57132 | 13.85845 | 13.60777 |
| C | 19.71540 | 17.16200 | 13.24890 |
| H | 20.69826 | 17.22636 | 13.35541 |
| H | 19.46124 | 17.75275 | 12.49509 |
| C | 19.59901 | 16.92339 | 15.65287 |
| H | 19.18623 | 17.32704 | 16.45747 |
| H | 20.58142 | 17.02039 | 15.72989 |

|    |          |          |          |
|----|----------|----------|----------|
| C  | 17.95542 | 15.71051 | 12.83430 |
| H  | 17.66586 | 16.20663 | 12.02806 |
| H  | 17.70561 | 14.76261 | 12.69174 |
| C  | 17.61839 | 17.55292 | 14.25506 |
| H  | 17.18112 | 17.82273 | 15.10063 |
| H  | 17.32186 | 18.17672 | 13.54550 |
| C  | 17.41585 | 15.27552 | 15.11865 |
| H  | 17.05488 | 14.37570 | 14.92037 |
| H  | 16.91307 | 15.64139 | 15.88884 |
| C  | 20.25171 | 14.71366 | 19.39730 |
| H  | 21.07123 | 15.13674 | 19.62344 |
| C  | 19.14167 | 15.37301 | 18.92044 |
| H  | 19.02677 | 16.30364 | 18.76640 |
| C  | 18.16413 | 14.27121 | 18.70086 |
| H  | 17.28465 | 14.36696 | 18.35673 |
| C  | 18.75268 | 13.09819 | 19.08267 |
| H  | 18.34438 | 12.24003 | 19.05645 |
| C  | 20.01894 | 13.36279 | 19.50546 |
| H  | 20.63980 | 12.71849 | 19.82336 |
| N  | 22.68668 | 14.53575 | 16.16742 |
| C  | 21.71546 | 14.27922 | 16.60659 |
| Ru | 24.55415 | 14.87966 | 15.41772 |
| P  | 24.55804 | 16.84099 | 16.53498 |
| P  | 25.23896 | 13.68900 | 17.20472 |
| N  | 24.42290 | 19.59478 | 16.38045 |

|   |          |          |          |
|---|----------|----------|----------|
| N | 23.45717 | 18.56736 | 18.38786 |
| N | 25.88135 | 18.67811 | 18.12075 |
| N | 25.02589 | 13.04450 | 19.89055 |
| N | 27.20089 | 12.63475 | 18.86964 |
| N | 25.28949 | 11.16497 | 18.36000 |
| C | 24.36287 | 18.35780 | 15.53980 |
| H | 23.49242 | 18.32778 | 15.06785 |
| H | 25.07753 | 18.39379 | 14.85646 |
| C | 23.28168 | 17.22432 | 17.82251 |
| H | 23.34092 | 16.55468 | 18.54846 |
| H | 22.38086 | 17.15714 | 17.41775 |
| C | 26.05806 | 17.36046 | 17.50624 |
| H | 26.84511 | 17.38314 | 16.90484 |
| H | 26.23622 | 16.69087 | 18.21416 |
| C | 23.33951 | 19.61315 | 17.37023 |
| H | 22.47509 | 19.50448 | 16.89828 |
| H | 23.32906 | 20.49599 | 17.81760 |
| C | 24.76053 | 18.72091 | 19.02696 |
| H | 24.86998 | 18.00349 | 19.70046 |
| H | 24.77806 | 19.58798 | 19.50873 |
| C | 25.68266 | 19.67309 | 17.10148 |
| H | 25.74521 | 20.56575 | 17.52099 |
| H | 26.42042 | 19.60053 | 16.44600 |
| C | 24.55078 | 14.04933 | 18.88439 |
| H | 23.56080 | 14.03256 | 18.84342 |

|   |          |          |          |
|---|----------|----------|----------|
| H | 24.83082 | 14.95652 | 19.16624 |
| C | 24.68674 | 11.65297 | 19.52512 |
| H | 23.70388 | 11.58861 | 19.41861 |
| H | 24.94090 | 11.06221 | 20.27892 |
| C | 24.80313 | 11.89158 | 17.12115 |
| H | 25.21591 | 11.48793 | 16.31655 |
| H | 23.82072 | 11.79458 | 17.04413 |
| C | 26.44672 | 13.10446 | 19.93971 |
| H | 26.73628 | 12.60834 | 20.74595 |
| H | 26.69653 | 14.05236 | 20.08228 |
| C | 26.78375 | 11.26205 | 18.51896 |
| H | 27.22102 | 10.99224 | 17.67339 |
| H | 27.08028 | 10.63825 | 19.22852 |
| C | 26.98629 | 13.53945 | 17.65536 |
| H | 27.34726 | 14.43927 | 17.85365 |
| H | 27.48907 | 13.17358 | 16.88517 |
| C | 24.15043 | 14.10131 | 13.37671 |
| H | 23.33091 | 13.67823 | 13.15057 |
| C | 25.26047 | 13.44195 | 13.85358 |
| H | 25.37537 | 12.51132 | 14.00762 |
| C | 26.23801 | 14.54376 | 14.07316 |
| H | 27.11750 | 14.44801 | 14.41729 |
| C | 25.64946 | 15.71678 | 13.69135 |
| H | 26.05776 | 16.57494 | 13.71757 |
| C | 24.38320 | 15.45218 | 13.26856 |

H 23.76234 16.09647 12.95065

Table S4. 60 lowest TD-B3LYP excitation energies for gas-phase complex **1**

|                   |                  |           |
|-------------------|------------------|-----------|
| Root 1 singlet a  | 0.121008278 a.u. | 3.2928 eV |
| Root 2 singlet a  | 0.130904121 a.u. | 3.5621 eV |
| Root 3 singlet a  | 0.131349652 a.u. | 3.5742 eV |
| Root 4 singlet a  | 0.134520921 a.u. | 3.6605 eV |
| Root 5 singlet a  | 0.137581164 a.u. | 3.7438 eV |
| Root 6 singlet a  | 0.138545074 a.u. | 3.7700 eV |
| Root 7 singlet a  | 0.141372995 a.u. | 3.8470 eV |
| Root 8 singlet a  | 0.142560493 a.u. | 3.8793 eV |
| Root 9 singlet a  | 0.145724779 a.u. | 3.9654 eV |
| Root 10 singlet a | 0.149627556 a.u. | 4.0716 eV |
| Root 11 singlet a | 0.150410258 a.u. | 4.0929 eV |
| Root 12 singlet a | 0.154204751 a.u. | 4.1961 eV |
| Root 13 singlet a | 0.161097948 a.u. | 4.3837 eV |
| Root 14 singlet a | 0.162403951 a.u. | 4.4192 eV |
| Root 15 singlet a | 0.163608262 a.u. | 4.4520 eV |
| Root 16 singlet a | 0.164637703 a.u. | 4.4800 eV |
| Root 17 singlet a | 0.165965732 a.u. | 4.5162 eV |
| Root 18 singlet a | 0.167097585 a.u. | 4.5470 eV |
| Root 19 singlet a | 0.167704954 a.u. | 4.5635 eV |
| Root 20 singlet a | 0.168169165 a.u. | 4.5761 eV |
| Root 21 singlet a | 0.168804979 a.u. | 4.5934 eV |
| Root 22 singlet a | 0.169426325 a.u. | 4.6103 eV |

|                   |                  |           |
|-------------------|------------------|-----------|
| Root 23 singlet a | 0.170068942 a.u. | 4.6278 eV |
| Root 24 singlet a | 0.171033772 a.u. | 4.6541 eV |
| Root 25 singlet a | 0.171386395 a.u. | 4.6637 eV |
| Root 26 singlet a | 0.172328313 a.u. | 4.6893 eV |
| Root 27 singlet a | 0.173034010 a.u. | 4.7085 eV |
| Root 28 singlet a | 0.175179974 a.u. | 4.7669 eV |
| Root 29 singlet a | 0.175713287 a.u. | 4.7814 eV |
| Root 30 singlet a | 0.175961249 a.u. | 4.7882 eV |
| Root 31 singlet a | 0.177421587 a.u. | 4.8279 eV |
| Root 32 singlet a | 0.177767896 a.u. | 4.8373 eV |
| Root 33 singlet a | 0.178258620 a.u. | 4.8507 eV |
| Root 34 singlet a | 0.179215071 a.u. | 4.8767 eV |
| Root 35 singlet a | 0.180216332 a.u. | 4.9039 eV |
| Root 36 singlet a | 0.181386030 a.u. | 4.9358 eV |
| Root 37 singlet a | 0.181999903 a.u. | 4.9525 eV |
| Root 38 singlet a | 0.182805998 a.u. | 4.9744 eV |
| Root 39 singlet a | 0.183480936 a.u. | 4.9928 eV |
| Root 40 singlet a | 0.184447578 a.u. | 5.0191 eV |
| Root 41 singlet a | 0.186310129 a.u. | 5.0698 eV |
| Root 42 singlet a | 0.186695466 a.u. | 5.0802 eV |
| Root 43 singlet a | 0.186879023 a.u. | 5.0852 eV |
| Root 44 singlet a | 0.187976412 a.u. | 5.1151 eV |
| Root 45 singlet a | 0.188805188 a.u. | 5.1377 eV |
| Root 46 singlet a | 0.189124246 a.u. | 5.1463 eV |
| Root 47 singlet a | 0.190526371 a.u. | 5.1845 eV |

|                   |                  |           |
|-------------------|------------------|-----------|
| Root 48 singlet a | 0.190765036 a.u. | 5.1910 eV |
| Root 49 singlet a | 0.191206227 a.u. | 5.2030 eV |
| Root 50 singlet a | 0.191414593 a.u. | 5.2087 eV |
| Root 51 singlet a | 0.193275857 a.u. | 5.2593 eV |
| Root 52 singlet a | 0.193792226 a.u. | 5.2734 eV |
| Root 53 singlet a | 0.194362278 a.u. | 5.2889 eV |
| Root 54 singlet a | 0.195118377 a.u. | 5.3094 eV |
| Root 55 singlet a | 0.195283234 a.u. | 5.3139 eV |
| Root 56 singlet a | 0.196268137 a.u. | 5.3407 eV |
| Root 57 singlet a | 0.197292730 a.u. | 5.3686 eV |
| Root 58 singlet a | 0.197692159 a.u. | 5.3795 eV |
| Root 59 singlet a | 0.198522502 a.u. | 5.4021 eV |
| Root 60 singlet a | 0.199067401 a.u. | 5.4169 eV |

Table S5. Atomic positions (in angstrom) for a representative configuration of the hydrated form of **1**

|    |        |         |        |
|----|--------|---------|--------|
| Ru | -2.201 | -17.906 | 14.064 |
| C  | -3.054 | -19.498 | 12.702 |
| C  | -1.946 | -16.076 | 13.067 |
| C  | -1.728 | -19.175 | 12.407 |
| P  | -4.092 | -17.011 | 14.962 |
| P  | -0.866 | -17.040 | 15.670 |
| C  | -0.828 | -19.496 | 13.341 |
| C  | -1.870 | -19.978 | 14.541 |
| C  | -3.080 | -20.019 | 13.973 |



|    |        |         |        |
|----|--------|---------|--------|
| H  | -3.696 | -19.395 | 12.120 |
| N  | -1.709 | -15.151 | 12.564 |
| H  | -1.571 | -18.792 | 11.561 |
| C  | -4.560 | -15.288 | 14.899 |
| C  | -5.687 | -17.659 | 14.433 |
| C  | -4.525 | -17.218 | 16.753 |
| C  | -1.140 | -15.328 | 16.361 |
| C  | 0.927  | -16.720 | 15.154 |
| C  | -0.426 | -17.887 | 17.206 |
| H  | -0.080 | -19.699 | 13.417 |
| H  | -1.497 | -20.501 | 15.241 |
| H  | -3.825 | -20.329 | 14.574 |
| Ru | -1.124 | -13.258 | 11.877 |
| N  | -5.886 | -14.983 | 15.478 |
| H  | -4.413 | -14.887 | 14.101 |
| H  | -3.988 | -14.683 | 15.265 |
| N  | -7.006 | -17.118 | 14.978 |
| H  | -5.682 | -17.516 | 13.384 |
| H  | -5.810 | -18.647 | 14.344 |
| N  | -5.859 | -16.798 | 17.109 |
| H  | -4.452 | -18.309 | 17.067 |
| H  | -3.932 | -17.141 | 17.505 |
| N  | -0.082 | -14.974 | 17.301 |
| H  | -1.234 | -14.713 | 15.622 |
| H  | -1.922 | -15.108 | 16.700 |

|   |        |         |        |
|---|--------|---------|--------|
| N | 1.818  | -16.108 | 16.364 |
| H | 0.756  | -16.167 | 14.482 |
| H | 1.330  | -17.425 | 14.708 |
| N | 0.492  | -17.179 | 18.109 |
| H | -1.321 | -18.265 | 17.615 |
| H | -0.086 | -18.777 | 17.059 |
| C | -2.396 | -11.586 | 12.481 |
| C | -1.288 | -11.169 | 11.759 |
| P | -2.278 | -13.811 | 10.008 |
| C | -0.138 | -11.312 | 12.375 |
| P | 0.777  | -14.222 | 11.158 |
| C | -1.802 | -12.063 | 13.654 |
| C | -0.404 | -11.929 | 13.597 |
| C | -6.956 | -15.726 | 14.723 |
| C | -6.049 | -15.395 | 16.885 |
| C | -6.986 | -17.458 | 16.432 |
| C | 1.333  | -14.971 | 16.733 |
| C | -0.049 | -15.929 | 18.346 |
| C | 1.840  | -17.034 | 17.463 |
| H | -3.332 | -11.274 | 12.400 |
| H | -1.269 | -10.590 | 10.886 |
| C | -2.316 | -12.774 | 8.560  |
| C | -2.177 | -15.388 | 9.148  |
| C | -4.146 | -13.914 | 10.298 |
| H | 0.692  | -11.108 | 11.943 |

|   |        |         |        |
|---|--------|---------|--------|
| C | 1.661  | -13.704 | 9.652  |
| C | 2.293  | -13.988 | 12.334 |
| C | 1.153  | -15.944 | 10.955 |
| H | -2.422 | -12.484 | 14.181 |
| H | 0.078  | -12.127 | 14.315 |
| H | -7.835 | -15.326 | 14.777 |
| H | -7.118 | -15.390 | 13.835 |
| H | -5.397 | -14.869 | 17.404 |
| H | -6.750 | -14.878 | 17.264 |
| H | -7.797 | -17.292 | 16.804 |
| H | -6.986 | -18.427 | 16.786 |
| H | 1.485  | -14.141 | 16.148 |
| H | 1.937  | -14.369 | 17.400 |
| H | 0.341  | -15.513 | 19.241 |
| H | -0.854 | -16.079 | 18.880 |
| H | 2.315  | -17.795 | 17.134 |
| H | 2.565  | -17.015 | 18.074 |
| H | -2.745 | -11.764 | 8.926  |
| N | -3.222 | -13.166 | 7.461  |
| H | -1.481 | -12.369 | 8.269  |
| N | -3.151 | -15.592 | 8.004  |
| H | -1.325 | -15.754 | 8.868  |
| H | -2.314 | -16.180 | 9.795  |
| H | -4.481 | -13.182 | 10.711 |
| N | -4.869 | -14.253 | 8.981  |

|   |        |         |        |
|---|--------|---------|--------|
| H | -4.211 | -14.608 | 10.921 |
| N | 2.966  | -14.274 | 9.494  |
| H | 1.062  | -13.589 | 8.811  |
| H | 1.700  | -12.689 | 9.597  |
| H | 2.416  | -13.058 | 12.644 |
| N | 3.629  | -14.490 | 11.875 |
| H | 1.970  | -14.284 | 13.239 |
| H | 0.556  | -16.520 | 10.530 |
| N | 2.577  | -16.357 | 10.704 |
| H | 0.717  | -16.382 | 11.672 |
| C | -2.878 | -14.568 | 7.097  |
| C | -4.669 | -13.177 | 7.976  |
| C | -4.505 | -15.434 | 8.390  |
| C | 2.892  | -15.651 | 9.492  |
| C | 3.883  | -13.963 | 10.455 |
| C | 3.487  | -15.927 | 11.687 |
| H | -3.266 | -14.889 | 6.149  |
| H | -2.053 | -14.431 | 6.655  |
| H | -5.115 | -13.130 | 7.136  |
| H | -5.128 | -12.418 | 8.312  |
| H | -5.429 | -15.600 | 7.872  |
| H | -4.846 | -16.243 | 8.792  |
| H | 3.719  | -16.248 | 8.979  |
| H | 2.382  | -16.126 | 8.775  |
| H | 4.877  | -14.152 | 10.250 |

|   |        |         |        |
|---|--------|---------|--------|
| H | 4.112  | -12.936 | 10.473 |
| H | 3.387  | -16.397 | 12.582 |
| H | 4.342  | -16.323 | 11.638 |
| O | -0.307 | -7.566  | 13.389 |
| H | -1.034 | -8.035  | 13.704 |
| H | 0.335  | -8.119  | 13.815 |
| O | 3.788  | -12.784 | 16.284 |
| H | 4.261  | -13.206 | 15.721 |
| H | 3.656  | -12.199 | 17.048 |
| O | 2.298  | -19.065 | 10.569 |
| H | 2.191  | -18.081 | 10.509 |
| H | 2.685  | -19.124 | 11.525 |
| O | 1.465  | -8.452  | 15.261 |
| H | 2.057  | -9.184  | 15.154 |
| H | 1.772  | -7.759  | 15.791 |
| O | -1.742 | -10.835 | 17.425 |
| H | -1.010 | -11.258 | 17.687 |
| H | -1.369 | -9.877  | 17.475 |
| O | -2.687 | -8.820  | 14.317 |
| H | -3.561 | -8.984  | 14.006 |
| H | -2.147 | -9.821  | 14.360 |
| O | -5.878 | -11.153 | 14.710 |
| H | -5.066 | -10.600 | 14.643 |
| H | -6.676 | -10.616 | 14.522 |
| O | -7.604 | -14.650 | 9.867  |

|   |        |         |        |
|---|--------|---------|--------|
| H | -8.055 | -14.036 | 9.358  |
| H | -6.593 | -14.407 | 9.755  |
| O | 1.971  | -9.828  | 9.983  |
| H | 1.292  | -10.186 | 9.264  |
| H | 1.873  | -8.989  | 9.964  |
| O | 5.063  | -13.075 | 13.585 |
| H | 4.355  | -13.543 | 13.050 |
| H | 5.249  | -12.336 | 12.978 |
| O | -3.811 | -10.261 | 7.617  |
| H | -3.505 | -11.164 | 7.483  |
| H | -3.783 | -9.857  | 6.835  |
| O | 4.045  | -19.163 | 16.684 |
| H | 4.236  | -18.268 | 16.058 |
| H | 4.864  | -19.390 | 17.326 |
| O | -4.263 | -8.683  | 12.173 |
| H | -4.202 | -9.342  | 11.509 |
| H | -5.034 | -8.124  | 12.146 |
| O | -5.297 | -12.175 | 19.936 |
| H | -4.776 | -11.428 | 19.940 |
| H | -5.533 | -12.156 | 18.973 |
| O | -4.732 | -16.995 | 11.477 |
| H | -5.603 | -16.998 | 10.908 |
| H | -4.209 | -17.389 | 10.671 |
| O | 6.820  | -16.479 | 13.086 |
| H | 6.498  | -17.156 | 12.770 |

|   |        |         |        |
|---|--------|---------|--------|
| H | 7.078  | -16.211 | 12.156 |
| O | -8.143 | -13.705 | 12.445 |
| H | -7.954 | -14.370 | 11.583 |
| H | -7.519 | -12.900 | 12.194 |
| O | 0.098  | -8.668  | 17.584 |
| H | 0.358  | -8.461  | 16.612 |
| H | 0.697  | -8.809  | 18.238 |
| O | 0.363  | -12.277 | 18.215 |
| H | 0.266  | -13.306 | 17.888 |
| H | 0.107  | -12.566 | 19.118 |
| O | 1.659  | -20.336 | 16.384 |
| H | 2.583  | -19.966 | 16.585 |
| H | 1.564  | -20.857 | 17.172 |
| O | -5.678 | -11.557 | 17.422 |
| H | -5.887 | -11.645 | 16.421 |
| H | -5.510 | -10.621 | 17.476 |
| O | 5.387  | -17.908 | 11.189 |
| H | 4.753  | -18.591 | 11.333 |
| H | 5.927  | -18.135 | 10.474 |
| O | 0.489  | -15.050 | 6.619  |
| H | 1.402  | -15.475 | 6.484  |
| H | -0.055 | -15.702 | 6.960  |
| O | -4.906 | -10.572 | 10.044 |
| H | -5.839 | -10.830 | 9.869  |
| H | -5.156 | -9.983  | 9.313  |

|   |        |         |        |
|---|--------|---------|--------|
| O | 3.520  | -10.813 | 12.064 |
| H | 2.691  | -10.588 | 11.614 |
| H | 4.078  | -10.415 | 11.473 |
| O | -0.858 | -11.740 | 6.069  |
| H | -1.646 | -11.957 | 6.495  |
| H | -0.644 | -11.796 | 5.206  |
| O | -5.981 | -12.076 | 12.108 |
| H | -5.665 | -11.829 | 12.973 |
| H | -5.240 | -11.581 | 11.465 |
| O | -2.780 | -18.123 | 6.984  |
| H | -1.942 | -18.113 | 6.464  |
| H | -2.826 | -17.279 | 7.162  |
| O | -0.258 | -10.197 | 8.449  |
| H | -0.525 | -9.259  | 8.509  |
| H | -0.504 | -10.577 | 7.711  |
| O | -4.317 | -18.734 | 9.218  |
| H | -4.888 | -19.283 | 9.514  |
| H | -4.205 | -18.390 | 8.334  |
| O | 1.988  | -12.250 | 6.713  |
| H | 1.005  | -12.291 | 6.557  |
| H | 2.257  | -13.218 | 6.813  |
| O | 2.784  | -18.613 | 13.176 |
| H | 3.229  | -17.959 | 13.834 |
| H | 2.426  | -19.196 | 13.606 |
| O | -0.213 | -19.256 | 9.496  |



|   |        |         |        |
|---|--------|---------|--------|
| H | -0.886 | -20.016 | 9.283  |
| H | 0.623  | -19.500 | 9.849  |
| O | 0.001  | -17.731 | 7.238  |
| H | -0.156 | -18.253 | 8.057  |
| H | 0.611  | -18.267 | 6.849  |
| O | -1.213 | -14.635 | 4.741  |
| H | -0.512 | -14.809 | 5.487  |
| H | -0.911 | -14.996 | 4.032  |
| O | -3.349 | -12.773 | 16.553 |
| H | -2.771 | -12.014 | 16.834 |
| H | -4.158 | -12.395 | 16.868 |
| O | -6.450 | -17.588 | 19.671 |
| H | -6.333 | -16.700 | 19.970 |
| H | -6.219 | -17.347 | 18.713 |
| O | 4.284  | -16.814 | 15.281 |
| H | 3.656  | -16.152 | 15.579 |
| H | 5.186  | -16.475 | 15.660 |

Table S6. 60 lowest TD-B3LYP excitation energies for a representative configuration of the hydrated form of **1**

|                  |                  |           |
|------------------|------------------|-----------|
| Root 1 singlet a | 0.113267651 a.u. | 3.0822 eV |
| Root 2 singlet a | 0.118036521 a.u. | 3.2119 eV |
| Root 3 singlet a | 0.120939319 a.u. | 3.2909 eV |
| Root 4 singlet a | 0.123612397 a.u. | 3.3637 eV |
| Root 5 singlet a | 0.124647148 a.u. | 3.3918 eV |
| Root 6 singlet a | 0.125745177 a.u. | 3.4217 eV |

|                   |                  |           |
|-------------------|------------------|-----------|
| Root 7 singlet a  | 0.128063698 a.u. | 3.4848 eV |
| Root 8 singlet a  | 0.128584145 a.u. | 3.4990 eV |
| Root 9 singlet a  | 0.129481984 a.u. | 3.5234 eV |
| Root 10 singlet a | 0.130409753 a.u. | 3.5486 eV |
| Root 11 singlet a | 0.131239164 a.u. | 3.5712 eV |
| Root 12 singlet a | 0.132634886 a.u. | 3.6092 eV |
| Root 13 singlet a | 0.134682884 a.u. | 3.6649 eV |
| Root 14 singlet a | 0.137189753 a.u. | 3.7331 eV |
| Root 15 singlet a | 0.137249982 a.u. | 3.7348 eV |
| Root 16 singlet a | 0.138320229 a.u. | 3.7639 eV |
| Root 17 singlet a | 0.139685616 a.u. | 3.8010 eV |
| Root 18 singlet a | 0.140246347 a.u. | 3.8163 eV |
| Root 19 singlet a | 0.140909353 a.u. | 3.8343 eV |
| Root 20 singlet a | 0.141359998 a.u. | 3.8466 eV |
| Root 21 singlet a | 0.143406915 a.u. | 3.9023 eV |
| Root 22 singlet a | 0.144182487 a.u. | 3.9234 eV |
| Root 23 singlet a | 0.144316696 a.u. | 3.9271 eV |
| Root 24 singlet a | 0.147679632 a.u. | 4.0186 eV |
| Root 25 singlet a | 0.149622117 a.u. | 4.0714 eV |
| Root 26 singlet a | 0.149781236 a.u. | 4.0758 eV |
| Root 27 singlet a | 0.150050277 a.u. | 4.0831 eV |
| Root 28 singlet a | 0.150897570 a.u. | 4.1061 eV |
| Root 29 singlet a | 0.151499408 a.u. | 4.1225 eV |
| Root 30 singlet a | 0.151718300 a.u. | 4.1285 eV |
| Root 31 singlet a | 0.152251330 a.u. | 4.1430 eV |

|                   |                  |           |
|-------------------|------------------|-----------|
| Root 32 singlet a | 0.153187714 a.u. | 4.1685 eV |
| Root 33 singlet a | 0.153594095 a.u. | 4.1795 eV |
| Root 34 singlet a | 0.155254644 a.u. | 4.2247 eV |
| Root 35 singlet a | 0.155513237 a.u. | 4.2317 eV |
| Root 36 singlet a | 0.155832930 a.u. | 4.2404 eV |
| Root 37 singlet a | 0.156431407 a.u. | 4.2567 eV |
| Root 38 singlet a | 0.156509920 a.u. | 4.2589 eV |
| Root 39 singlet a | 0.158916527 a.u. | 4.3243 eV |
| Root 40 singlet a | 0.159285975 a.u. | 4.3344 eV |
| Root 41 singlet a | 0.159945521 a.u. | 4.3523 eV |
| Root 42 singlet a | 0.162049732 a.u. | 4.4096 eV |
| Root 43 singlet a | 0.162176393 a.u. | 4.4130 eV |
| Root 44 singlet a | 0.162877388 a.u. | 4.4321 eV |
| Root 45 singlet a | 0.164386241 a.u. | 4.4732 eV |
| Root 46 singlet a | 0.165261534 a.u. | 4.4970 eV |
| Root 47 singlet a | 0.167430187 a.u. | 4.5560 eV |
| Root 48 singlet a | 0.168042569 a.u. | 4.5727 eV |
| Root 49 singlet a | 0.168287891 a.u. | 4.5793 eV |
| Root 50 singlet a | 0.168549978 a.u. | 4.5865 eV |
| Root 51 singlet a | 0.168883441 a.u. | 4.5956 eV |
| Root 52 singlet a | 0.169413226 a.u. | 4.6100 eV |
| Root 53 singlet a | 0.169624092 a.u. | 4.6157 eV |
| Root 54 singlet a | 0.170150272 a.u. | 4.6300 eV |
| Root 55 singlet a | 0.171622959 a.u. | 4.6701 eV |
| Root 56 singlet a | 0.172083431 a.u. | 4.6826 eV |

|                   |                  |           |
|-------------------|------------------|-----------|
| Root 57 singlet a | 0.173771098 a.u. | 4.7286 eV |
| Root 58 singlet a | 0.174261601 a.u. | 4.7419 eV |
| Root 59 singlet a | 0.174731012 a.u. | 4.7547 eV |
| Root 60 singlet a | 0.176305083 a.u. | 4.7975 eV |

- 
- <sup>1</sup> A. Romerosa, T. Campos-Malpartida, C. Lidrissi, M. Saoud, M. Serrano-Ruiz, M. Peruzzini, J. A. Garrido-Cardenas and F. Garcia-Maroto, *Inorg. Chem.*, 2006, **45**, 1289.
- <sup>2</sup> (a) A. Altamore, G. Cascarano, C. Giacobozzo, A. Guagliardi, G. Moliterni, M.C.Burla, G. Polidori, M. Camalli and R. Spagna, *Sir 97 Package Program*, 1997; (b) G.M. Sheldrick, *SHELXTL Version 6.14*; Bruker-AXS Madison, WI, 2003.
- <sup>3</sup> Experimental details of the X-ray crystal structure determination for complex **2** are given in the Supporting Information.
- <sup>4</sup> Cambridge Structural Database (CDS): <http://www.ccdc.cam.ac.uk/products/csd/> (October **2007**).
- <sup>5</sup> (a) G. E. Pieslinger, P. Albores, L.D. Slep, B. J. Coe, C. J. Timpson and L. M. Baraldo, *Inorg Chem.*, 2013, **52**, 2906; (b) G. J. Baird, S. G. Davies, S. D. Moon, S. J. Simpson and R. H. Jones, *J. Chem. Soc. Dalton Trans.*, 1985, 1479.
- <sup>6</sup> (a) A. D. Phillips, L. Gonsalvi, A. Romerosa, F. Vizza and M. Peruzzini, *Coord. Chem. Rev.*, 2004, **248**, 955; (b) D. N. Akbayeva, L. Gonsalvi, W. Oberhauser, M. Peruzzini, F. Vizza, P. Brüggeller, A. Romerosa, G. Sava and A. Bergamo, *Chem. Commun.*, 2003, 264; (c) A. Romerosa, T. Campos-Malpartida, C. Lidrissi, M. Saoud, M. Serrano-Ruiz, M. Peruzzini, J. A. Garrido-Cardenas and F. Garcia-Maroto, *Inorg. Chem.*, 2006, **45**, 1289; (d) C. A. Mebi and B. J. Frost, *Inorg. Chem.*, 2007, **46**, 7115; (e) S. Bolaño, J. Bravo, J. Castro, M. M. Rodríguez-Rocha, M. Fátima, C. Guedes da Silva, A. J. L. Pombeiro, L. Gonsalvi and M. Peruzzini, *Eur. J. Inorg. Chem.*, 2007, 5523; (f) A. Romerosa, M. Saoud, T. Campos-Malpartida, C. Lidrissi, M. Serrano-Ruiz, M. Peruzzini, J. A. Garrido and F. García-Maroto, *Eur. J. Inorg. Chem.*, 2007, 2803.
- <sup>7</sup> (a) A. K. Soper, *RAL Tech. Rep.*, 2011, **RAL-TR-2011-012**; (b) A. K. Soper, *Mol. Simul.*, 2012, **38**, 1171; (c) H. Berendsen, J. Grigera, and T. Straatsma, *J. Phys. Chem.* **1987**, *91*, 6269.
- <sup>8</sup> (a) A. Szabo and N. S. Ostlund, *Modern quantum chemistry*; Dover Publications Inc., Mineola, New York, 1996; (b) A. D. Becke, *J. Chem. Phys.*, 1993, **98**, 1372; (c) C. Lee, W. Yang and R. G. Parr, *Phys. Rev. B*, 1988, **37**, 785.
- <sup>9</sup> (a) C. Lee, W. Yang and R. G. Parr, *Phys. Rev. B*, 1988, **37**, 785; (b) M. Valiev *et al.*, *Comput. Phys. Comm.*, 2010, **181**, 1477.
